# Supplementary material
Source: publisher figshare collection journal article supplement (https://frontiersin.figshare.com/ndownloader/files/17360432)
Supplement: Supplementary file [file 17360432]

# Multi-view subspace clustering analysis for aggregating multiple heterogeneous omics data

Qianqian Shi<sup>1\*</sup>, Bing Hu<sup>2</sup>, Tao Zeng<sup>3</sup>, Chuanchao Zhang<sup>4\*</sup>

<sup>1</sup>Hubei Key Laboratory of Agricultural Bioinformatics, College of Informatics, Huazhong Agricultural University, Wuhan 430070, China

<sup>2</sup>Department of Applied Mathematics, College of Science, Zhejiang University of Technology, Hangzhou 310023, China

<sup>3</sup>Key Laboratory of Systems Biology, Institute of Biochemistry and Cell Biology, Shanghai Institute of Biological Sciences, Chinese Academy of Sciences, Shanghai 200031, China

<sup>4</sup>Wuhan Institute of Huawei Technologies, Wuhan 430070, China

\*Corresponding authors:

Qianqian Shi: qqshi@mail.hzau.edu.cn;

Chuanchao Zhang: chaozhangchuan@163.com

## S1. Synthetic examples

Simulation datasets were generated as in [1]. Firstly, two real biological datasets of different platforms, e.g., gene expression and methylation profiles, were prepared including GSE49278 and GSE49277 [2]. 90 samples were randomly selected and 2 types of data were constructed, referred to as  $X_1$  and  $X_2$ , where rows present biological measurements and columns for samples. Then, singular value decomposition (SVD:  $X = UDV$ ) was applied in data matrices  $X_1$ , and  $X_2$ , respectively.

$$X_1 = U_1 D_1 V_1 \quad \text{and} \quad X_2 = U_2 D_2 V_2$$

In order to preserve the true biological characteristics in data, we kept the matrices  $U$ s and modified the matrices  $V$ s with 3 pre-defined clusters, i.e., samples 1-30 for cluster 1, 31-60 for cluster 2, and 61-90 for cluster 3. Cluster 2 and cluster 3 can't be distinguished in data type 1, while cluster 1 and cluster 2 appear more close from data type 2. Only the combination of two data types can recover the full cluster structures.

In order to better mimic different types of heterogeneity (i.e., embedded subspaces), we generated two types of simulation data sets, wherein the weak

heterogeneous example denoted as simData1 with samples in a single subspace and the strong one as simData2 underlying three manifold subspaces. Such difference is implemented by modifying the matrices  $V$ s when generating two data sets.

For simData1, the modification of  $V$ s is as follows:

$$v_{ij} = mean^k + value_{ij} \quad (1)$$

where  $value_{ij} \sim N(0,1)$  represents random biases for expression of element  $i$  in sample  $j$ ;  $mean^k \in \{2,6\}$  represents the average expression level in cluster  $k$  ( $k=1, 2$ ) for each data type. For example, samples 1-30 belong to same cluster and 31-90 are assigned into the other cluster in data type 1; and in data type 2, samples 1-60 are grouped together and 61-90 as the other cluster. Base on equation (1), the pre-designed matrices  $V_{sim1}$  and  $V_{sim2}$  represent corresponding sample structures in 2 types of data for simData1.

For simData2, we need to construct three different subspaces in data of strong heterogeneity. For convenience, we selected three rows of matrices  $V$ s, which have the largest singular values, as the defined subspaces, and the remaining values are all equal to 0. Then, the pattern matrices  $V_{sim1}$  and  $V_{sim2}$  could be generated as follows:

$$V_{sim1} = \begin{bmatrix} 10*\text{rand}(1,30)+5, 10*\text{rand}(1,30)+5, 10*\text{rand}(1,30)+5 \\ 0*\text{rand}(1,30), 10*\text{rand}(1,30)+5, 10*\text{rand}(1,30)+5 \\ 10*\text{rand}(1,30)+5, 0*\text{rand}(1,30), 0*\text{rand}(1,30) \\ \mathbf{0} \end{bmatrix}$$

$$V_{sim2} = \begin{bmatrix} 10*\text{rand}(1,30)+5, 10*\text{rand}(1,30)+5, 10*\text{rand}(1,30)+5 \\ 0*\text{rand}(1,30), 0*\text{rand}(1,30), 10*\text{rand}(1,30)+5 \\ 10*\text{rand}(1,30)+5, 10*\text{rand}(1,30)+5, 0*\text{rand}(1,30) \\ \mathbf{0} \end{bmatrix}$$

where the function  $\text{rand}(n,m)$  return a  $n$ -by- $m$  matrix of pseudorandom uniform values.

Finally, the simulated data sets  $X_{layer1}$  and  $X_{layer2}$  for simData1 and simiData2 were thus created by:

$$X_{layer1} = U_1 D_1 V_{sim1} \quad \text{and} \quad X_{layer2} = U_2 D_2 V_{sim2}$$

**Table S1.** Description of CCLE data used in this study.

| <b>Tumor type</b>                                 | <b>Sample size</b> |
|---------------------------------------------------|--------------------|
| breast carcinoma                                  | 33                 |
| central nervous system (glioma grade IV)          | 35                 |
| acute myeloid leukaemia                           | 34                 |
| multiple myeloma                                  | 29                 |
| colorectal adenocarcinoma                         | 43                 |
| lung adenocarcinoma                               | 47                 |
| lung small cell carcinoma                         | 53                 |
| lung squamous cell carcinoma                      | 27                 |
| pancreas ductal carcinoma                         | 26                 |
| melanoma                                          | 60                 |
| upper aerodigestive tract squamous cell carcinoma | 28                 |

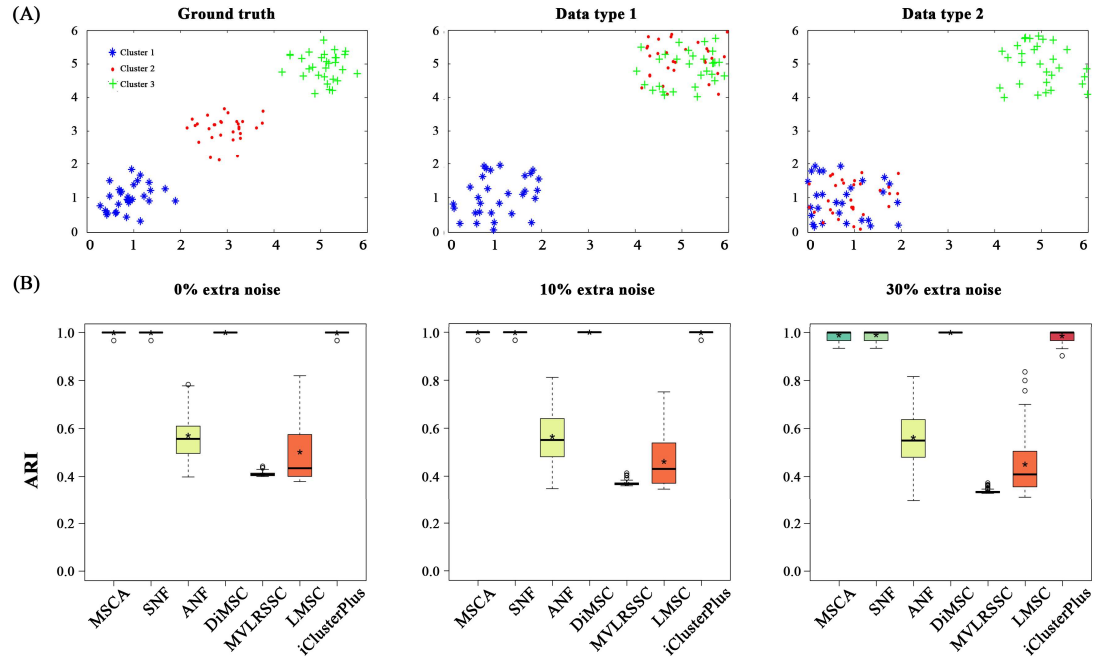

**Figure S1. A simulation study on simData1.** (A) 2D Illustration of sample patterns in different feature spaces. Data points, i.e., samples, are colored and shaped by their true cluster labels. Clean cluster boundaries only can be seen in a integrative affine space. Points in two clusters may be mislabeling in a single coordinated space, i.e., Cluster 2 and 3 for data type 1, Cluster 1 and cluster 2 for type 2. (B) The clustering accuracy comparison among MSCA, SNF, ANF, iClusterPlus and other multi-view subspace clustering algorithms under different noise conditions, measures their effectiveness on detecting integrated sample-patterns.

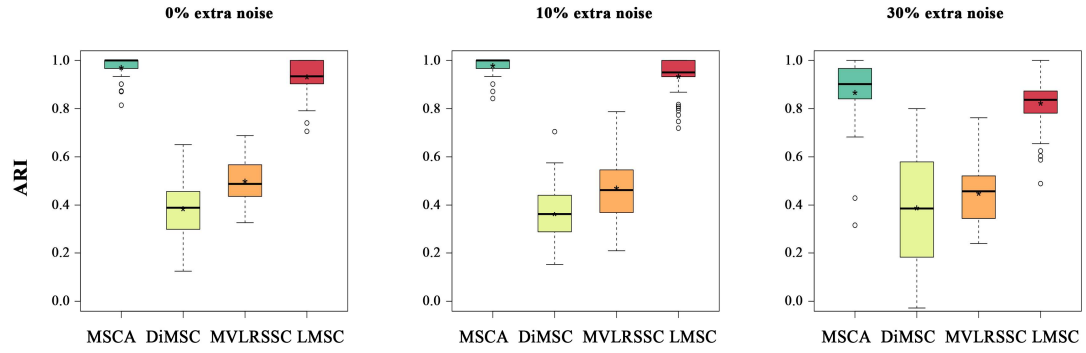

**Figure S2. Comparison of several multi-view subspace clustering algorithms (i.e., DiMSC, MVLRSSC and LMSC) on simData2.**

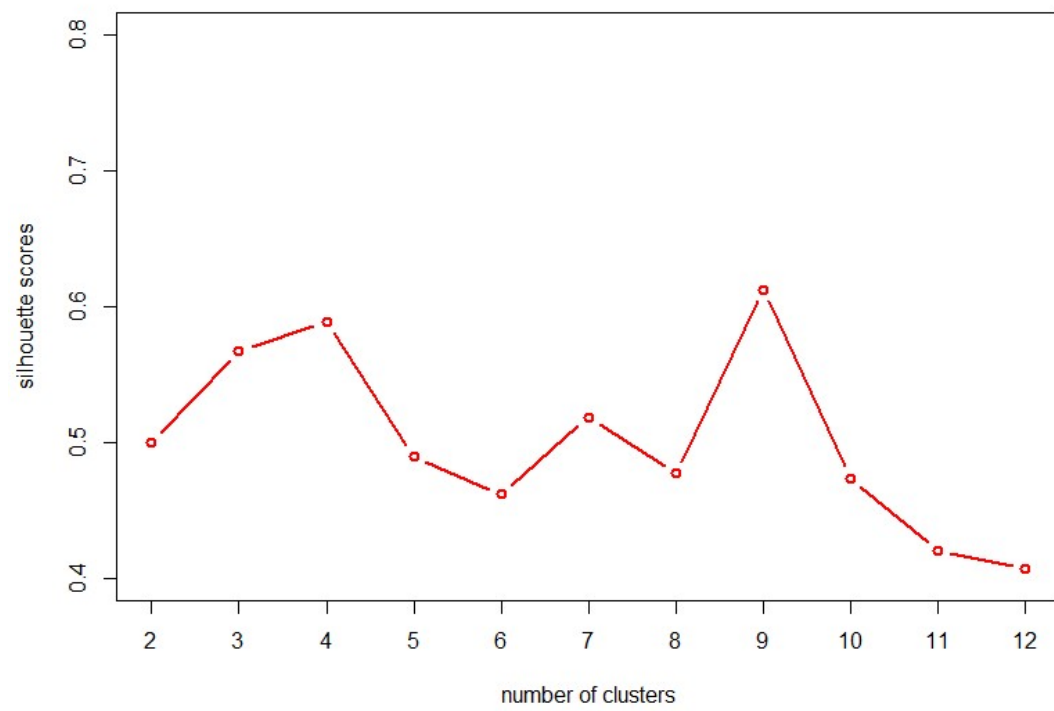

**Figure S3. Determination of number of clusters for CCLE data.**

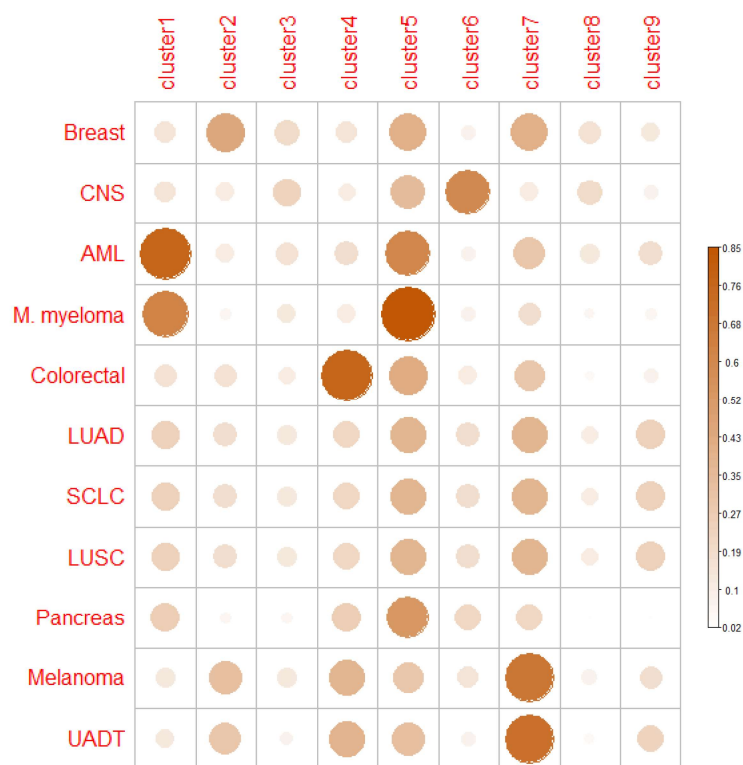

**Figure S4. The proportion of cluster over-expressed gene sets to tissue-specific gene sets.** A high value indicates strong lineage-dependency.

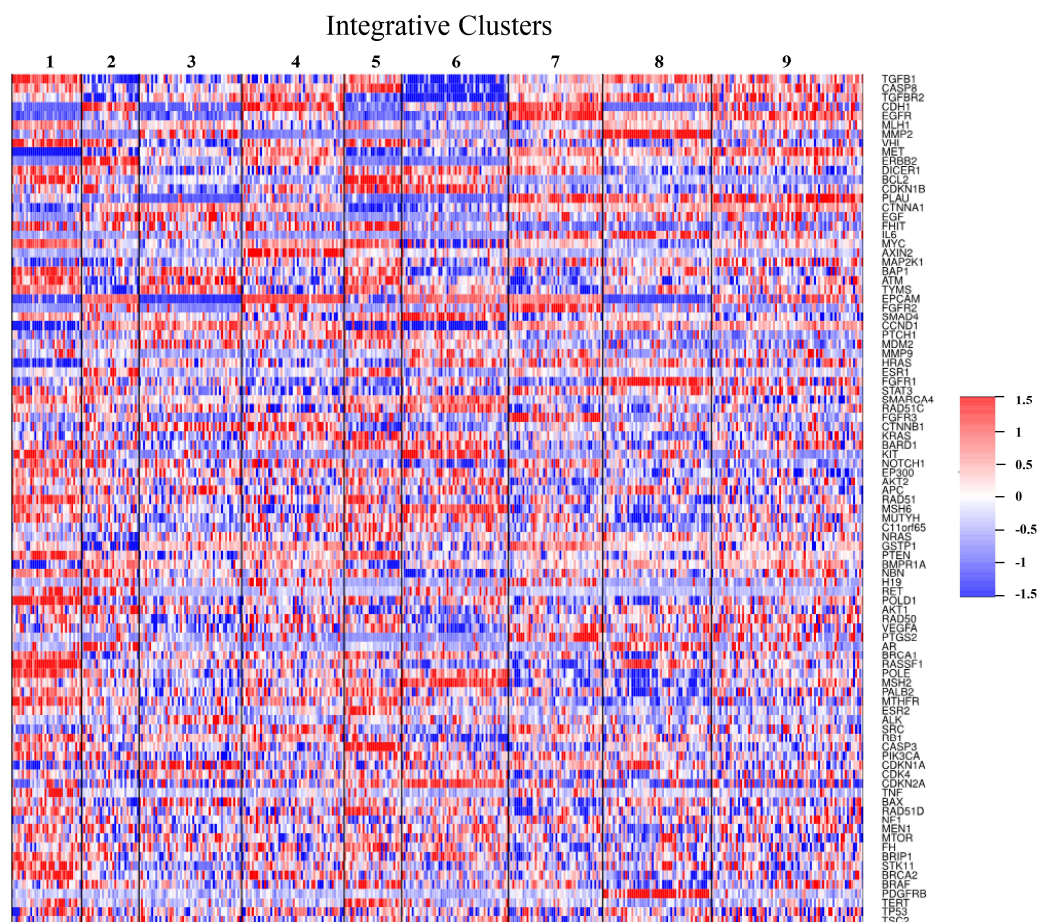

**Figure S5. The expression patterns of top 100 cancer related genes.** Rows are genes and columns are cell line samples sorted by cluster assignment.
